# Supplementary material for: Effects of fou8/fry1 Mutation on Sulfur Metabolism: Is Decreased Internal Sulfate the Trigger of Sulfate Starvation Response?
Source: PubMed Central journal article supplement (PMC3377649; doi:10.1371/journal.pone.0039425), 2012-06-18
Supplement: pone.0039425.s001.pdf [file pone.0039425.s001.pdf]

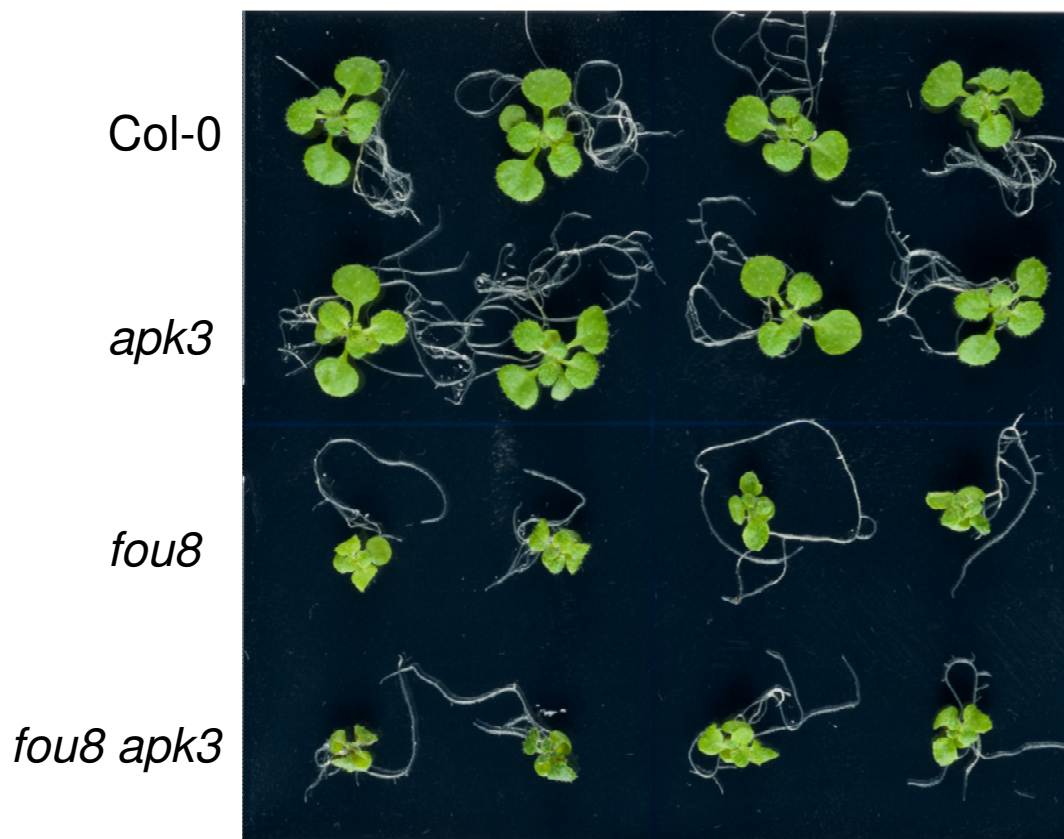

Supplemental Figure S1. Phenotypes of 2-weeks old seedlings of Col-0, *apk3*, *fou8*, and *fou8 apk3* plants.
