# Supplementary material for: Effects of fou8/fry1 Mutation on Sulfur Metabolism: Is Decreased Internal Sulfate the Trigger of Sulfate Starvation Response?
Source: PubMed Central journal article supplement (PMC3377649; doi:10.1371/journal.pone.0039425), 2012-06-18
Supplement: pone.0039425.s002.pdf [file pone.0039425.s002.pdf]

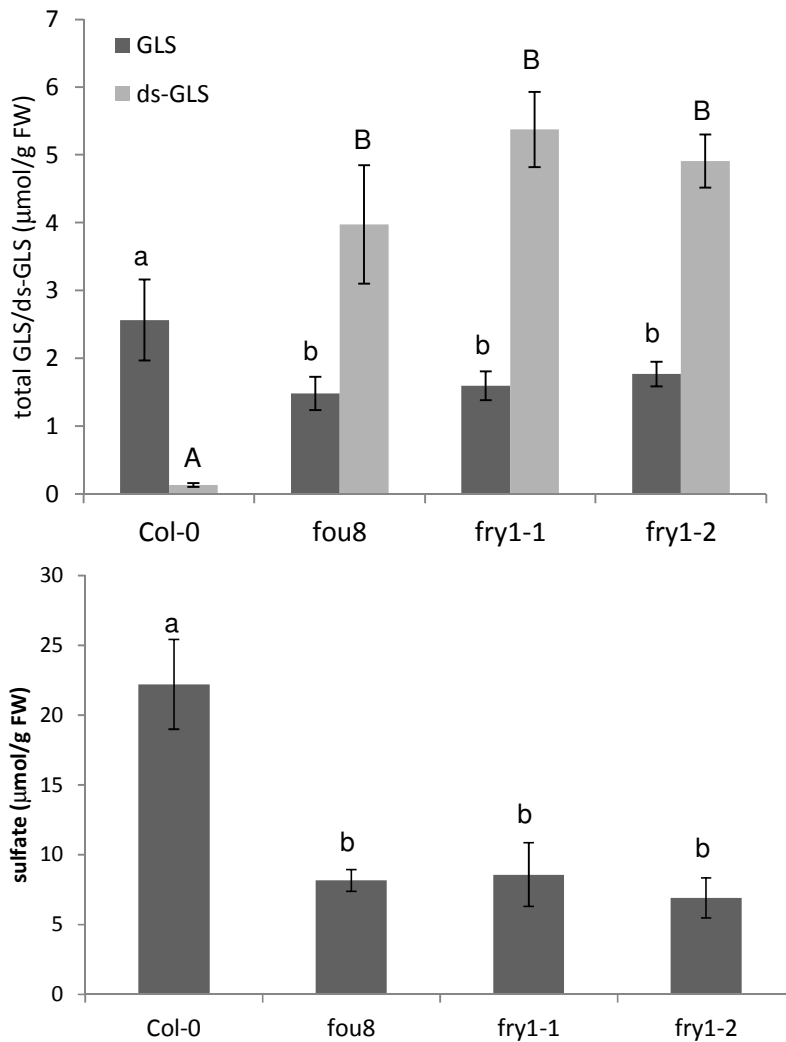

Supplemental Figure S2. Glucosinolate and sulfate accumulation in different alleles of *fry1*.

Col-0, *fou8*, and 2 T-DNA insertion lines in *FIERY1* gene (*fry1-1*, SALK\_020882 and *fry1-2*, SALK\_151367) plants were grown for 5 weeks in controlled environment room. (a) The total contents of glucosinolates and desulfo-glucosinolates, and (b) sulfate content were measured in leaves. Results are presented as means  $\pm$  SD from three pools of three individual plants, different letters mark values significantly different at  $P < 0.05$ .
