# Supplementary material for: Effects of fou8/fry1 Mutation on Sulfur Metabolism: Is Decreased Internal Sulfate the Trigger of Sulfate Starvation Response?
Source: PubMed Central journal article supplement (PMC3377649; doi:10.1371/journal.pone.0039425), 2012-06-18
Supplement: pone.0039425.s003.pdf [file pone.0039425.s003.pdf]

**Supplemental Table S1.** Relative expression of genes involved in glucosinolate synthesis in microarray analysis of *apk1 apk2* mutant [20] and three alleles of *fou8/fry1* [8] [9]. The complement of genes of glucosinolate synthesis network has been taken from [21]. Ratios of transcripts mutant vs. Col-0 and corresponding p-values (T-test) are presented as well as results of qPCR analysis with selected genes. Ratios greater than 1.5 are marked red and p-values smaller than 0.05 are yellow.

| AGI       |           | apk1 apk2 |         | fry1/C24 |        | alx8/Col-0 |        | fry1-2/Col-0 |        | qPCR |        |
|-----------|-----------|-----------|---------|----------|--------|------------|--------|--------------|--------|------|--------|
| AT3G19710 | BCAT4     | 4.08      | 0.00010 | 1.24     | 0.1442 | 0.85       | 0.0615 | 1.25         | 0.0719 |      |        |
| AT4G12030 | BAT5      | 2.79      | 0.00019 | 1.39     | 0.0995 | 0.59       | 0.0078 | 1.40         | 0.1123 |      |        |
| AT5G23010 | MAM1      | 3.17      | 0.00000 | 1.39     | 0.0346 | 1.16       | 0.0480 | 1.23         | 0.2087 |      |        |
| AT5G23020 | MAM3      | 10.11     | 0.00002 | 0.27     | 0.0173 | 0.35       | 0.0262 | 1.55         | 0.2073 | 0.8  | 0.087  |
| AT4G13430 | IPMI LSU  | 2.35      | 0.00009 | 1.36     | 0.0239 | 1.00       | 0.4655 | 1.21         | 0.0321 |      |        |
| AT2G43100 | IPMI SSU2 | 4.76      | 0.00000 | 1.19     | 0.2378 | 1.15       | 0.0813 | 1.15         | 0.0380 |      |        |
| AT3G58990 | IPMI SSU3 | 3.67      | 0.00001 | 0.56     | 0.0700 | 1.99       | 0.0039 | 1.10         | 0.1972 |      |        |
| AT5G14200 | IPMDH1    | 3.25      | 0.00007 | 0.84     | 0.1864 | 1.10       | 0.1390 | 0.95         | 0.3279 |      |        |
| AT3G49680 | BCAT3     | 1.76      | 0.00005 | 1.59     | 0.0080 | 1.03       | 0.3704 | 0.96         | 0.2935 |      |        |
| AT1G16410 | CYP79F1   | 4.50      | 0.00005 | 1.39     | 0.1096 | 1.47       | 0.0260 | 1.04         | 0.4423 |      |        |
| AT1G16400 | CYP79F2   | 4.50      | 0.00005 | 1.39     | 0.1096 | 1.47       | 0.0260 | 1.04         | 0.4423 | 4.1  | 0.004  |
| AT4G13770 | CYP83A1   | 2.19      | 0.00003 | 1.34     | 0.0482 | 1.23       | 0.0075 | 1.17         | 0.1770 |      |        |
| AT3G03190 | GSTF11    | 3.39      | 0.00003 | 1.15     | 0.2200 | 1.04       | 0.4240 | 0.92         | 0.3084 |      |        |
| AT1G78370 | GSTU20    | 3.38      | 0.00004 | 0.97     | 0.4444 | 0.81       | 0.0240 | 0.99         | 0.4761 |      |        |
| AT4G30530 | GGP1      | 1.89      | 0.00067 | 1.69     | 0.0023 | 0.57       | 0.0008 | 1.17         | 0.1641 |      |        |
| AT2G20610 | SUR1      | 1.93      | 0.00019 | 1.45     | 0.0540 | 1.43       | 0.0036 | 1.14         | 0.1032 | 0.82 | 0.174  |
| AT2G31790 | UGT74C1   | 2.09      | 0.00018 | 1.81     | 0.0070 | 1.26       | 0.0582 | 1.12         | 0.1653 |      |        |
| AT1G74090 | SOT18     | 2.37      | 0.00020 | 1.44     | 0.0571 | 1.17       | 0.0595 | 1.23         | 0.0866 | 2.1  | 0.002  |
| AT1G18590 | SOT17     | 4.19      | 0.00001 | 1.56     | 0.0786 | 2.33       | 0.0017 | 1.11         | 0.3348 | 1.4  | 0.001  |
| AT1G65860 | FMO-GSOX1 | 3.25      | 0.00000 | 1.38     | 0.0950 | 0.75       | 0.0479 | 1.20         | 0.1401 |      |        |
| AT1G62540 | FMO-GSOX2 | 2.03      | 0.01189 | 0.94     | 0.3468 | 1.00       | 0.4978 | 1.04         | 0.3799 |      |        |
| AT1G62560 | FMO-GSOX3 | 3.12      | 0.00021 | 1.28     | 0.2105 | 0.78       | 0.0161 | 1.12         | 0.1429 |      |        |
| AT1G62570 | FMO-GSOX4 | 1.21      | 0.04733 | 0.94     | 0.2450 | 1.39       | 0.1273 | 1.02         | 0.4076 |      |        |
| AT1G12140 | FMO-GSOX5 | 1.22      | 0.00065 | 0.87     | 0.1586 | 1.33       | 0.0068 | 0.99         | 0.4645 |      |        |
| AT4G03050 | AOP3      | 0.99      | 0.45940 | 0.92     | 0.2252 | 1.13       | 0.0044 | 1.32         | 0.0964 |      |        |
| AT4G03060 | AOP2      | 3.23      | 0.00002 | 0.75     | 0.1390 | 1.86       | 0.0042 | 2.06         | 0.1109 |      |        |
| AT2G25450 | GS-OH     | 2.12      | 0.00004 | 2.49     | 0.0186 | 1.89       | 0.0019 | 1.06         | 0.3372 |      |        |
| AT5G05260 | CYP79A2   | 1.02      | 0.23466 | 0.96     | 0.3682 | 0.88       | 0.1200 | 1.03         | 0.2295 |      |        |
| AT4G39950 | CYP79B2   | 8.99      | 0.00032 | 9.07     | 0.0066 | 8.76       | 0.0001 | 1.54         | 0.2270 | 21   | 0.0002 |
| AT2G22330 | CYP79B3   | 4.86      | 0.00037 | 5.10     | 0.0018 | 7.37       | 0.0001 | 2.26         | 0.1402 |      |        |
| AT4G31500 | CYP83B1   | 2.02      | 0.00056 | 2.04     | 0.0068 | 2.43       | 0.0001 | 1.44         | 0.2152 | 1.8  | 0.02   |
| AT2G30860 | GSTF9     | 1.78      | 0.00002 | 1.28     | 0.0250 | 0.74       | 0.0002 | 0.93         | 0.0674 |      |        |
| AT1G24100 | UGT74B1   | 2.00      | 0.00035 | 2.02     | 0.0462 | 1.87       | 0.0015 | 1.45         | 0.0860 |      |        |
| AT2G30870 | GSTF10    | 1.30      | 0.00944 | 0.85     | 0.2100 | 1.44       | 0.0601 | 1.05         | 0.4239 |      |        |

|           |         |      |         |      |        |      |        |      |        |      |        |
|-----------|---------|------|---------|------|--------|------|--------|------|--------|------|--------|
| AT1G74100 | SOT16   | 2.29 | 0.00210 | 1.27 | 0.1206 | 2.36 | 0.0017 | 1.34 | 0.0183 | 2.51 | 0.02   |
| AT5G57220 | CYP81F2 | 0.65 | 0.04030 | 0.41 | 0.0048 | 1.39 | 0.0057 | 1.16 | 0.1692 |      |        |
| AT5G61420 | MYB28   | 1.33 | 0.00934 | 0.64 | 0.0133 | 0.56 | 0.0034 | 0.97 | 0.4146 | 1.12 | 0.073  |
| AT5G07690 | MYB29   | 2.17 | 0.00012 | 0.65 | 0.0936 | 0.85 | 0.1944 | 1.13 | 0.2963 | 1.62 | 0.0007 |
| AT5G07700 | MYB76   | 2.94 | 0.00376 | 1.16 | 0.1584 | 1.04 | 0.2749 | 0.87 | 0.2475 |      |        |
| AT1G18570 | MYB51   | 1.45 | 0.02443 | 0.58 | 0.0794 | 1.06 | 0.4154 | 1.10 | 0.2044 | 0.6  | 0.02   |
| AT1G74080 | MYB122  | 1.02 | 0.43586 | 1.08 | 0.0376 | 0.88 | 0.0573 | 1.08 | 0.1921 | 12.9 | 0.02   |
| AT5G60890 | MYB34   | 2.21 | 0.00013 | 1.43 | 0.0868 | 2.95 | 0.0107 | 1.01 | 0.4755 | 6.8  | 0.0004 |
| AT5G63980 | FRY1    | 2.02 | 0.00014 | 0.99 | 0.4680 | 1.82 | 0.0832 | 0.93 | 0.3306 | 0.47 | 0.015  |
