# Supplementary material for: Effects of fou8/fry1 Mutation on Sulfur Metabolism: Is Decreased Internal Sulfate the Trigger of Sulfate Starvation Response?
Source: PubMed Central journal article supplement (PMC3377649; doi:10.1371/journal.pone.0039425), 2012-06-18
Supplement: pone.0039425.s004.pdf [file pone.0039425.s004.pdf]

**Supplemental Table S2.** AtGen express treatments which produce similar changes to genes significantly affected in expression in *fry1/fou8*.

| Group number                                                   | Group Name                                                                                                  | Total Members | Number Changed | P-Value  |
|----------------------------------------------------------------|-------------------------------------------------------------------------------------------------------------|---------------|----------------|----------|
| <b>groups upregulated in ron1 mutant (Robles et al., 2010)</b> |                                                                                                             |               |                |          |
| 41                                                             | COLD ROOT 0.5-3HRS UP                                                                                       | 91            | 5              | 2.96E-05 |
| 255                                                            | 1 MIN RED LIGHT 45 MINS DARK UP                                                                             | 83            | 5              | 7.07E-05 |
| 253                                                            | FAR RED LIGTH 45 MINS UP                                                                                    | 89            | 5              | 9.87E-05 |
| 257                                                            | RED LIGHT 45 MINS UP                                                                                        | 96            | 5              | 0.000141 |
| 24                                                             | ABA DOWN                                                                                                    | 54            | 3              | 0.000632 |
| 70                                                             | GENOTOXIC SHOOT 0.5-3HRS DOWN                                                                               | 25            | 9              | 0.000813 |
| 68                                                             | GENOTOXIC ROOT 0.5-3HRS UP                                                                                  | 121           | 2              | 0.001088 |
| 153                                                            | BRASSINAZOLE 220 10uM 3-12HRS UP                                                                            | 40            | 3              | 0.001122 |
| 128                                                            | WOUNDING SHOOT 0.25-3HRS DOWN                                                                               | 26            | 10             | 0.001462 |
| 222                                                            | SAR TISSUE FROM UNINFILTRATED HALF OF HALF PSEUDOMONAS SYRINGAE ES4326 INFILTRATED LEAF 4-16HRS UP          | 59            | 57             | 0.00195  |
| 227                                                            | SAR TISSUE FROM UNINFILTRATED HALF OF HALF PSEUDOMONAS SYRINGAE ES4326 INFILTRATED LEAF 1-2DAYS DOWN        | 63            | 61             | 0.002049 |
| 44                                                             | COLD SHOOT 0.5-3HRS DOWN                                                                                    | 59            | 56             | 0.002061 |
| 188                                                            | ERYSIPHE ORONTII INFECTION 1-2DAYS DOWN                                                                     | 56            | 10             | 0.002167 |
| 106                                                            | OXIDATIVE SHOOT 0.5-3HRS DOWN                                                                               | 17            | 9              | 0.002206 |
| 112                                                            | SALT SHOOT 0.5-3HRS DOWN                                                                                    | 71            | 70             | 0.002325 |
| 261                                                            | WHITE LIGHT 45 MINS UP                                                                                      | 108           | 4              | 0.002523 |
| 91                                                             | METHYL JASMONATE DOWN                                                                                       | 66            | 18             | 0.002567 |
| 129                                                            | WOUNDING ROOT 6-24HRS UP                                                                                    | 80            | 13             | 0.002713 |
| 55                                                             | DROUGHT SHOOT 6-24HRS UP                                                                                    | 84            | 27             | 0.002733 |
| 95                                                             | OSMOTIC SHOOT 0.5-3HRS DOWN                                                                                 | 86            | 85             | 0.002798 |
| 229                                                            | <b>SULPHATE STARVATION 12-24HRS UP</b>                                                                      | 16            | 3              | 0.00303  |
| 120                                                            | UV-B SHOOT 0.25-3HRS DOWN                                                                                   | 96            | 92             | 0.003124 |
| 117                                                            | UV-B ROOT 0.25-3HRS UP                                                                                      | 98            | 21             | 0.003189 |
| <b>groups upregulated in fry1 mutant (Wilson et al., 2009)</b> |                                                                                                             |               |                |          |
| 75                                                             | GENOTOXIC SHOOT 6-24HRS DOWN                                                                                | 22            | 14             | 0.000733 |
| 229                                                            | <b>SULPHATE STARVATION 12-24HRS UP</b>                                                                      | 16            | 7              | 0.000736 |
| 55                                                             | DROUGHT SHOOT 6-24HRS UP                                                                                    | 84            | 3              | 0.000983 |
| 225                                                            | SAR TISSUE FROM UNINFILTRATED HALF OF HALF PSEUDOMONAS SYRINGAE ES4326 AVRRT2 INFILTRATED LEAF 1-2DAYS DOWN | 23            | 23             | 0.001092 |
| 186                                                            | ERYSIPHE ORONTII INFECTION 6-18HRS UP                                                                       | 20            | 3              | 0.001392 |
| 102                                                            | OXIDATIVE ROOT 6-24HRS UP                                                                                   | 44            | 9              | 0.001533 |
| 129                                                            | WOUNDING ROOT 6-24HRS UP                                                                                    | 80            | 2              | 0.001703 |
| 153                                                            | BRASSINAZOLE 220 10uM 3-12HRS UP                                                                            | 40            | 5              | 0.001706 |
| 121                                                            | UV-B ROOT 6-24HRS UP                                                                                        | 33            | 8              | 0.001728 |
| 222                                                            | SAR TISSUE FROM UNINFILTRATED HALF OF HALF PSEUDOMONAS SYRINGAE ES4326 INFILTRATED LEAF 4-16HRS UP          | 59            | 22             | 0.001919 |
| 44                                                             | COLD SHOOT 0.5-3HRS DOWN                                                                                    | 59            | 55             | 0.001963 |
| 227                                                            | SAR TISSUE FROM UNINFILTRATED HALF OF HALF PSEUDOMONAS SYRINGAE ES4326 INFILTRATED LEAF 1-2DAYS DOWN        | 63            | 61             | 0.002049 |

|     |                                         |    |    |          |
|-----|-----------------------------------------|----|----|----------|
| 218 | PROTEASOME INHIBITOR MG132 10uM 3HRS UP | 94 | 4  | 0.002144 |
| 112 | SALT SHOOT 0.5-3HRS DOWN                | 71 | 70 | 0.002324 |
| 53  | DROUGHT ROOT 6-24HRS UP                 | 48 | 12 | 0.002498 |
| 58  | HAIRPINZ DOWN                           | 80 | 78 | 0.002602 |
| 255 | 1 MIN RED LIGHT 45 MINS DARK UP         | 83 | 81 | 0.002708 |
| 95  | OSMOTIC SHOOT 0.5-3HRS DOWN             | 86 | 80 | 0.002798 |
| 253 | FAR RED LIGTH 45 MINS UP                | 89 | 50 | 0.002901 |
| 120 | UV-B SHOOT 0.25-3HRS DOWN               | 96 | 90 | 0.003124 |
| 257 | RED LIGHT 45 MINS UP                    | 96 | 93 | 0.003129 |
| 117 | UV-B ROOT 0.25-3HRS UP                  | 98 | 25 | 0.003189 |
| 188 | ERYSIPHE ORONTII INFECTION 1-2DAYS DOWN | 56 | 49 | 0.003529 |

**groups upregulated in alx8 mutant (Wilson et al., 2009)**

SAR TISSUE FROM UNINFILTRATED HALF OF HALF

PSEUDOMONAS SYRINGAE ES4326 INFILTRATED LEAF 4-16HRS

|     |                                         |     |    |          |
|-----|-----------------------------------------|-----|----|----------|
| 222 | UP                                      | 59  | 8  | 1.63E-09 |
| 55  | DROUGHT SHOOT 6-24HRS UP                | 84  | 7  | 4.60E-07 |
| 117 | UV-B ROOT 0.25-3HRS UP                  | 98  | 6  | 1.78E-05 |
| 129 | WOUNDING ROOT 6-24HRS UP                | 80  | 5  | 2.01E-05 |
| 218 | PROTEASOME INHIBITOR MG132 10uM 3HRS UP | 94  | 3  | 0.000168 |
| 61  | LIPOPOLYSACCARIDE UP                    | 25  | 3  | 0.00021  |
| 53  | DROUGHT ROOT 6-24HRS UP                 | 48  | 2  | 0.000338 |
| 191 | ERYSIPHE ORONTII INFECTION 3-5DAYS DOWN | 102 | 3  | 0.000402 |
| 228 | <b>SULPHATE STARVATION 2-8HRS UP</b>    | 5   | 5  | 0.00045  |
| 229 | <b>SULPHATE STARVATION 12-24HRS UP</b>  | 16  | 6  | 0.000541 |
| 75  | GENOTOXIC SHOOT 6-24HRS DOWN            | 22  | 11 | 0.000717 |
| 77  | HEAT ROOT 0.25-3HRS DOWN                | 42  | 3  | 0.000734 |
| 186 | ERYSIPHE ORONTII INFECTION 6-18HRS UP   | 20  | 5  | 0.000919 |
| 159 | 6-DEOXCATHASTERONE (1 uM, 3 HOURS) DOWN | 116 | 5  | 0.001144 |
| 102 | OXIDATIVE ROOT 6-24HRS UP               | 44  | 2  | 0.001187 |
| 35  | BRASSINOLIDE UP                         | 41  | 5  | 0.001525 |
| 70  | GENOTOXIC SHOOT 0.5-3HRS DOWN           | 25  | 6  | 0.001584 |

SAR TISSUE FROM UNINFILTRATED HALF OF HALF

PSEUDOMONAS SYRINGAE ES4326 INFILTRATED LEAF 1-

|     |                                                      |     |    |          |
|-----|------------------------------------------------------|-----|----|----------|
| 227 | 2DAYS DOWN                                           | 63  | 61 | 0.002049 |
| 44  | COLD SHOOT 0.5-3HRS DOWN                             | 59  | 56 | 0.002067 |
| 112 | SALT SHOOT 0.5-3HRS DOWN                             | 71  | 69 | 0.002379 |
|     | EHTYLENE INHIBITOR AMINOETHOXYVINYLGLYCINE 10uM      |     |    |          |
| 194 | 3HRS UP                                              | 117 | 4  | 0.002492 |
| 58  | HAIRPINZ DOWN                                        | 80  | 78 | 0.002602 |
| 255 | 1 MIN RED LIGHT 45 MINS DARK UP                      | 83  | 77 | 0.002702 |
| 188 | ERYSIPHE ORONTII INFECTION 1-2DAYS DOWN              | 56  | 6  | 0.002774 |
| 95  | OSMOTIC SHOOT 0.5-3HRS DOWN                          | 86  | 80 | 0.002798 |
| 156 | BRASSINAZOLE 91 10uM 3-12HRS DOWN                    | 66  | 7  | 0.002857 |
| 253 | FAR RED LIGTH 45 MINS UP                             | 89  | 86 | 0.002904 |
|     | GA BIOSYTH INHIBITOR UNICONAZOLE (10 uM, 3-12 HOURS) |     |    |          |
| 200 | UP                                                   | 59  | 6  | 0.002966 |
| 120 | UV-B SHOOT 0.25-3HRS DOWN                            | 96  | 95 | 0.003124 |
| 257 | RED LIGHT 45 MINS UP                                 | 96  | 93 | 0.003126 |
| 153 | BRASSINAZOLE 220 10uM 3-12HRS UP                     | 40  | 7  | 0.003284 |
| 189 | ERYSIPHE ORONTII INFECTION 6-18HRS DOWN              | 15  | 3  | 0.003691 |
| 91  | METHYL JASMONATE DOWN                                | 66  | 60 | 0.00371  |
| 24  | ABA DOWN                                             | 54  | 2  | 0.003721 |
