# Supplementary material for: Effects of fou8/fry1 Mutation on Sulfur Metabolism: Is Decreased Internal Sulfate the Trigger of Sulfate Starvation Response?
Source: PubMed Central journal article supplement (PMC3377649; doi:10.1371/journal.pone.0039425), 2012-06-18
Supplement: pone.0039425.s005.pdf [file pone.0039425.s005.pdf]

**Supplemental Table S3.** AtGen express treatments which produce similar changes to genes significantly affected in expression in *cad2* and *rax1* (Ball *et al.*, 2004).

| Group number                                    | Group Name                                             | Total Members | Number Changed | P-Value  |
|-------------------------------------------------|--------------------------------------------------------|---------------|----------------|----------|
| <b>groups upregulated in <i>cad2</i> mutant</b> |                                                        |               |                |          |
| 41                                              | COLD ROOT 0.5-3HRS UP                                  | 22            | 6              | 1.61E-10 |
| 166                                             | 3-DEHYDRO-6-DEOXOTEASTERONE (1 UM, 3 HOURS) UP         | 40            | 6              | 2.34E-10 |
| 168                                             | 3-DEHYDROTEASTERONE (1 UM, 3 HOURS) UP                 | 69            | 8              | 5.76E-10 |
| 172                                             | TYPHASTEROL (1 UM, 3 HOURS) UP                         | 76            | 8              | 7.16E-10 |
| 79                                              | HEAT SHOOT 0.25-3HRS DOWN                              | 59            | 11             | 1.28E-09 |
| 178                                             | BRASSINOLIDE (1 UM, 3 HOURS) UP                        | 92            | 8              | 1.34E-09 |
| 49                                              | DROUGHT ROOT 0.25-3HRS UP                              | 33            | 8              | 1.63E-09 |
| 174                                             | 6-DEOXOCASTASTERONE (1 UM, 3 HOURS) UP                 | 84            | 13             | 2.25E-09 |
| 176                                             | CASTASTERONE (100 NM, 3 HOURS) UP                      | 91            | 13             | 2.58E-09 |
| 43                                              | COLD SHOOT 0.5-3HRS UP                                 | 55            | 12             | 2.79E-09 |
| 164                                             | TEASTERONE (1 UM, 3 HOURS) UP                          | 38            | 5              | 6.94E-09 |
| 112                                             | SALT SHOOT 0.5-3HRS DOWN                               | 34            | 9              | 7.19E-09 |
| 170                                             | 6-DEOXOTYPHASTEROL (1 UM, 3 HOURS) UP                  | 32            | 7              | 1.95E-08 |
| 162                                             | 6-DEOXOTEASTERONE (1 UM, 3 HOURS) UP                   | 24            | 4              | 3.77E-08 |
| 74                                              | GENOTOXIC SHOOT 6-24HRS UP                             | 58            | 7              | 8.62E-08 |
| 100                                             | OXIDATIVE SHOOT 6-24HRS UP                             | 61            | 7              | 1.23E-07 |
| 88                                              | AUXIN UP                                               | 41            | 7              | 1.59E-07 |
| 160                                             | CATHASTERONE (1 UM, 3 HOURS) UP                        | 12            | 3              | 7.30E-07 |
| 51                                              | DROUGHT SHOOT 0.25-3HRS UP                             | 76            | 9              | 2.12E-05 |
| 158                                             | 6-DEOXOCATHASTERONE (1 UM, 3 HOURS) UP                 | 12            | 3              | 2.92E-05 |
| 72                                              | GENOTOXIC ROOT 6-24HRS UP                              | 83            | 8              | 3.12E-05 |
| 35                                              | BRASSINOLIDE UP                                        | 13            | 2              | 4.31E-05 |
| 188                                             | ERYSIPHE ORONTII INFECTION 1-2DAYS DOWN                | 22            | 4              | 6.92E-05 |
| 189                                             | ERYSIPHE ORONTII INFECTION 6-18HRS DOWN                | 5             | 3              | 0.000701 |
| 138                                             | 24HRS 3uM ABA DURING 48HRS SEED IMBIBITION DOWN        | 44            | 5              | 0.001247 |
| 70                                              | GENOTOXIC SHOOT 0.5-3HRS DOWN                          | 12            | 10             | 0.001528 |
| 95                                              | OSMOTIC SHOOT 0.5-3HRS DOWN                            | 32            | 4              | 0.001756 |
| 149                                             | AUXIN INHIBITOR UP (BOTH PCIB & 2,4,6-t)               | 20            | 2              | 0.002579 |
| 60                                              | FLAGELLIN DOWN                                         | 19            | 18             | 0.003737 |
| <b>groups upregulated in <i>rax1</i> mutant</b> |                                                        |               |                |          |
| 144                                             | 2,4,6-t AUXIN INHIBITOR DOWN                           | 69            | 8              | 2.53E-05 |
|                                                 | JASMONIC ACID BIOSYNTH INHIBITOR IBUPROFEN 10uM 3HRS   |               |                |          |
| 209                                             | DOWN                                                   | 75            | 8              | 0.000165 |
| 169                                             | 3-DEHYDROTEASTERONE (1 UM, 3 HOURS) DOWN               | 55            | 4              | 0.001534 |
| 64                                              | GIBBERELLIN UP                                         | 4             | 3              | 0.001551 |
| 152                                             | AUXIN TRANSPORT INHIBITOR DOWN (BOTH NPA & TIBA)       | 62            | 6              | 0.001687 |
| 75                                              | GENOTOXIC SHOOT 6-24HRS DOWN                           | 11            | 9              | 0.001898 |
| 73                                              | GENOTOXIC ROOT 6-24HRS DOWN                            | 13            | 4              | 0.001899 |
| 189                                             | ERYSIPHE ORONTII INFECTION 6-18HRS DOWN                | 5             | 4              | 0.002337 |
|                                                 | GA BIOSYTH INHIBITOR PROPICONAZOLE (10 UM, 3-12 HOURS) |               |                |          |
| 199                                             | DOWN                                                   | 22            | 11             | 0.002543 |
|                                                 | GA BIOSYTH INHIBITOR PACLOBUTRAZOL (10 UM, 3-12 HOURS) |               |                |          |
| 203                                             | DOWN                                                   | 37            | 4              | 0.002753 |
| 70                                              | GENOTOXIC SHOOT 0.5-3HRS DOWN                          | 12            | 8              | 0.002785 |
| 60                                              | FLAGELLIN DOWN                                         | 19            | 11             | 0.002851 |
| 162                                             | 6-DEOXOTEASTERONE (1 UM, 3 HOURS) UP                   | 24            | 16             | 0.003246 |

|     |                                        |    |    |          |
|-----|----------------------------------------|----|----|----------|
| 95  | OSMOTIC SHOOT 0.5-3HRS DOWN            | 32 | 29 | 0.003584 |
| 112 | SALT SHOOT 0.5-3HRS DOWN               | 34 | 28 | 0.003668 |
| 160 | CATHASTERONE (1 UM, 3 HOURS) UP        | 12 | 8  | 0.00375  |
| 158 | 6-DEOXOCATHASTERONE (1 UM, 3 HOURS) UP | 12 | 8  | 0.00375  |
| 272 | RED LIGHT 4HRS DOWN                    | 57 | 5  | 0.003782 |
