# Supplementary material for: Effects of fou8/fry1 Mutation on Sulfur Metabolism: Is Decreased Internal Sulfate the Trigger of Sulfate Starvation Response?
Source: PubMed Central journal article supplement (PMC3377649; doi:10.1371/journal.pone.0039425), 2012-06-18
Supplement: pone.0039425.s006.pdf [file pone.0039425.s006.pdf]

**Supplemental Table S4.** Primers used for qRT-PCR.

| <b>gene</b>               | <b>5' primer</b>            | <b>3' primer</b>          |
|---------------------------|-----------------------------|---------------------------|
| <i>TIP41</i>              | GTGAAAACGTGTTGGAGAGAAGCA    | TCAACTGGATACCCTTTCGC      |
| <i>ATPS1</i>              | CACTCGGAGGTTTCATGAGAG       | AGACGTAGCGAGTTAAAATGAAGAG |
| <i>ATPS2</i>              | GATCTTGAGTGGGTTTCATGTGAT    | CTCATCTTCTCTCATGAACCCTTT  |
| <i>ATPS3</i>              | TGGGTTTATGAGGGAATCTGAG      | GACCCATCATCGAGATTCAAC     |
| <i>ATPS4</i>              | CAAAGGTTTCATGAGACAGTCAG     | GAGCCGGAACGAGTTAAAATG     |
| <i>APR1</i>               | CGATCAAGTATCCGTCGTAGAAG     | GGACAAGATTCAAGAACGAAGTC   |
| <i>APR2</i>               | AAAAGAGCTCCACGGGCTAT        | CGACATGAGTGAATCAACATCTC   |
| <i>APR3</i>               | CCAATCAAGTATCCATCAGAGAAG    | CCGAACAAGATTCAAGAAAGATG   |
| <i>APK1</i>               | CCTTACGAGCCACCATTGAACTG     | GCCATTTTCGATAGGAGAAGTTCCT |
| <i>APK2</i>               | CAAATCAAAGGCTTCACTGGAATC    | TGTTTCAGCACTACCTCGCAATT   |
| <i>APK3</i>               | GTTGAAAGAGAAAGAGGGAGAGTGTC  | AGAGATCACTTCCTCAGCCATAGC  |
| <i>APK4</i>               | TCTTCTTCTCTGTGTGAAATGGCAG   | TTCTTCAGGTATCCATTTTGGTCC  |
| <i>SULTR2;1</i>           | CAGAGAGTTTTGAATCTCTCTCACATC | CCATCTGGATCATGTGTGTTG     |
| <i>LS5</i><br>(At5g26220) | TCCACCGGAGCTATTTGC          | CGTTCAGTACTCCATTGCT       |
| <i>LS2</i><br>(At5g48850) | TCCCTGTGGAGACACTCCTT        | CCATCTCCGGGTTCTTCTCT      |
| <i>SOT17</i>              | GGAATCCAAAACCATAAACGACG     | CGGATCTTTTGGTCTCCAGCC     |
| <i>SOT18</i>              | CCCTACCGAGTCACGACGAGA       | GGTAGCCACCAGTAACCACCATACT |
| <i>MAM-L</i>              | TTCGTTACTTCTCACATCGTCGAG    | GGAGCAACATGAGACGAACAGAGT  |
| <i>SUR1</i>               | GGATTCTCCCCGCAAGAC          | CATCCAGCGGTCAGAAAA        |
| <i>TSB</i>                | ACGAAGAAGCGTTGGAAGC         | GGTAAGCTAGTGCGTGTGAGG     |
| <i>LOX2</i>               | CTTACCCGCGGATCTCATC         | ACTCCATGTTCTGCGGTCTT      |
| <i>LOX3</i>               | CGCCAATCAACAGTTTCTGA        | CTCGTCTCGTGGCACATACA      |
| <i>FRY1</i>               | CTGAAGGTGGTCCAAATGGT        | TGATCTCCCCTCAGAAATCC      |
